# Supplementary material for: FOXP2 exhibits projection neuron class specific expression, but is not required for multiple aspects of cortical histogenesis
Source: eLife. 2019 May 17;8:e42012. doi: 10.7554/eLife.42012 (PMC6561705; doi:10.7554/eLife.42012)
Supplement: Figure 1—figure supplement 1—source data 1. [file elife-42012-fig1-figsupp1-data1.xlsx]

## Sheet: Sheet1
P0 S1BF							P7 S1BF							P14 S1BF
	ID	PT	Foxp2	Colocalization	%PT Foxp2+			ID	PT	Foxp2	Colocalization	%PT Foxp2+		ID	PT	Foxp2	Colocalization	%PT Foxp2+
rostral	992-1-2B-s1R	149	678	34	22.8188		rostral	479-1-1A-s2R	225	463	15	6.66667		19914-5	67	620	0	0
middle	992-1-2A-s3R	154	659	73	47.4026		middle	479-1-1A-s4L	211	476	45	21.327		19972-2	72	509	1	1.38889
caudal	992-1-2B-s5R	208	654	96	46.1538		caudal	479-1-2B-s2L	115	440	15	13.0435		19973-1	62	455	3	4.83871
				average	38.7917						average	13.6791		19973-2	52	732	5	9.61538
														19973-3	67	616	4	5.97015
rostral	992-3-1B-s6L	162	599	34	20.9877		rostral	479-4-1A-s3R	168	439	12	7.14286
middle	992-3-1B-s8L	158	604	51	32.2785		middle	479-4-2B-s1R	111	358	3	2.7027		average	64	586.4		4.36263
caudal	992-3-2B-s3L	171	532	75	43.8596		caudal	479-4-2B-s4R	144	375	4	2.77778
				average	32.3753						average	4.20778
rostral	992-5-1B-s4R	180	754	49	27.2222		rostral	532-1-2B-s2L	133	365	6	4.51128
middle	992-5-1B-s7R	174	712	49	28.1609		middle	532-1-2B-s4L	136	363	10	7.35294
caudal	992-5-2B-s2L	179	543	60	33.5196		caudal	532-1-3B-s2L	122	375	20	16.3934
				average	29.6342						average	9.41922
							rostral	532-4-1C-s2L	113	450	14	12.3894
							middle	532-4-2C-s1L	149	414	11	7.38255
							caudal	532-4-2C-s3L	147	393	39	26.5306
											average	15.4342
							rostral		138	352	12	8.69565
							middle	532-5-2B-s4L	130	348	5	3.84615
							caudal	532-5-3D-s2L	123	435	13	10.5691
											average	7.70364
