# Supplementary material for: FOXP2 exhibits projection neuron class specific expression, but is not required for multiple aspects of cortical histogenesis
Source: eLife. 2019 May 17;8:e42012. doi: 10.7554/eLife.42012 (PMC6561705; doi:10.7554/eLife.42012)
Supplement: Figure 1—source data 1. [file elife-42012-fig1-data1.xlsx]

## Sheet: Sheet1
Figure 1A	Layer 6 CT Cells
File Name	CTB (VB)	Foxp2	CTB + Foxp2	Foxp2+CTB/CTB
P14-19433-3-3E-s1L-MetGFP488 CTB555 Foxp2647-7-3-16.ims	49	614	37	0.755102
P14-19438-3-3A-s1L-MetGFP488 CTB555 Foxp2647-7-3-16.ims	127	595	107	0.84252
P14-19438-2-3A-s1R-MetGFP488 CTB555 Foxp2647-7-3-16.ims	67	644	48	0.716418
P14-19438-4-3A-s2L-MetGFP488 CTB555 Foxp2647-7-3-16.ims	71	611	58	0.816901
Figure 1A	Layer 6 CC Cells
File Name	CTB (M1)	Foxp2	CTB + Foxp2	Foxp2+CTB/CTB
P14-19629-1-4B-s3L	91	587	12	0.131868
P14-19629-2-4B-s2L	72	561	3	0.0416667
P14-19712-1-4A-s1L	100	944	5	0.05
P14-19712-2-4A-s1L	116	761	5	0.0431034
P14-19712-3-3A-s4L	56	888	3	0.0535714
Figure 1DEF
Age	Rostrocaudal Level	File Name	Total Cells			Colocated Cells					Ntsr1-Cre Fraction					GFP Cell Fraction
			Ntsr1	GFP	Foxp2	Ntsr1+ GFP+	Foxp2+ GFP+	Ntsr1+ Foxp2+			GFP+ Ntsr1+/Ntsr1+		Foxp2+Ntsr1+/Ntsr1+			Ntsr1+GFP+/GFP+		Foxp2+GFP+/GFP+
P0	Caudal	P0-28919-2-2D-s6L-MetGFP488 tdTomato Foxp2-647-20x-3-12-16	559	366	1167	17	55	473			0.0304114		0.846154			0.0464481		0.150273
P0	Caudal	P0-28919-4-2D-s2R-MetGFP488tdTomatoFoxp2-647-20x-4-1-16	418	268	1380	8	56	369			0.0191388		0.882775			0.0298507		0.208955
P0	Caudal	P0-28921-1-2D-s6L-MetGFP488 tdTomato Foxp2-647-20x-4-1-16	668	414	1382	29	75	610			0.0434132		0.913174			0.0700483		0.181159
P0	Middle	P0-28919-2-2D-s4R-MetGFP488 tdTomato Foxp2-647-20x-3-12-16	596	337	1359	9	38	543			0.0151007		0.911074			0.0267062		0.11276
P0	Middle	P0-28919-4-1D-s6R-MetGFP488tdTomatoFoxp2-647-20x-4-1-16	681	311	1844	16	43	613			0.0234949		0.900147			0.0514469		0.138264
P0	Middle	P0-28921-1-2D-s4L-MetGFP488 tdTomato Foxp2-647-20x-4-1-16	599	382	1268	26	42	562			0.0434057		0.93823			0.0680628		0.109948
P0	Rostral	P0-28919-2-2D-s2R-MetGFP488 tdTomato Foxp2-647-20x-3-12-16	551	317	1473	24	93	506			0.0435572		0.91833			0.0757098		0.293375
P0	Rostral	P0-28919-4-1D-s5R-MetGFP488tdTomatoFoxp2-647-20x-4-1-16	490	212	1835	9	78	403			0.0183673		0.822449			0.0424528		0.367925
P0	Rostral	P0-28921-1-2D-s2R-MetGFP488 tdTomato Foxp2-647-20x-4-1-16	480	335	1129	19	69	448			0.0395833		0.933333			0.0567164		0.20597
P7	Caudal	P7-18890-2-3E-Ntsr1-cre MetGFP488 Foxp2647-4-1-16	537	371	649	15	15	435			0.027933		0.810056			0.0404313		0.0404313
P7	Caudal	P7-19648-3-3C-Foxp2647 Ntsr1tdTomato and MetGFP-9-12-16	717	415	981	31	57	623			0.0432357		0.868898			0.0746988		0.137349
P7	Caudal	P7-19813-6-3B-s2L-Foxp2647 Ntsr1tdTomato and MetGFP-9-21-16	583	397	734	24	29	525			0.0411664		0.900515			0.0604534		0.0730479
P7	Middle	P7-18890-2-2E-s3L-Ntsr1-cre MetGFP488 Foxp2647-4-5-16	603	429	818	35	48	513			0.0580431		0.850746			0.0815851		0.111888
P7	Middle	P7-19648-3-2D-s3L-Foxp2647 Ntsr1tdTomato and MetGFP-9-12-16	664	350	987	17	54	594			0.0256024		0.894578			0.0485714		0.154286
P7	Middle	P7-19813-6-2D-s3L-Foxp2647 Ntsr1tdTomato and MetGFP-9-21-16	567	458	705	25	44	512			0.0440917		0.902998			0.0545852		0.0960699
P7	Rostral	P7-18890-2-1E-s4R-Ntsr1-cre MetGFP488 Foxp2647-4-5-16	635	524	1015	25	55	552			0.0393701		0.869291			0.0477099		0.104962
P7	Rostral	P7-19648-3-1E-s4L-Foxp2647 Ntsr1tdTomato and MetGFP-9-12-16	655	321	928	24	47	577			0.0366412		0.880916			0.0747664		0.146417
P7	Rostral	P7-19813-6-2D-s1R-Foxp2647 Ntsr1tdTomato and MetGFP-9-21-16	584	390	764	20	47	518			0.0342466		0.886986			0.0512821		0.120513
P14	Caudal	P14-19774-1-4A-S3L-MetGFP488 TdTom Foxp2-647-4-8-16	459	95	659	2	1	413			0.0043573		0.899782			0.0210526		0.0105263
P14	Caudal	P14-19026-2-3A-S1L-MetGFP488 TdTom Foxp2-647-4-8-16	439	202	699	3	14	399			0.00683371		0.908884			0.0148515		0.0693069
P14	Caudal	P14-19026-3-4E-S1L-MetGFP488 TdTom Foxp2-647-4-8-16	398	191	622	7	20	369			0.0175879		0.927136			0.0366492		0.104712
P14	Middle	P14-19774-1-3A-S3L-MetGFP488 TdTom Foxp2-647-4-8-16	499	109	693	0	0	418			0		0.837675			0		0
P14	Middle	P14-19026-2-2A-S1R-MetGFP488 TdTom Foxp2-647-4-8-16	412	170	785	4	14	382			0.00970874		0.927184			0.0235294		0.0823529
P14	Middle	P14-19026-3-3E-S2L-MetGFP488 TdTom Foxp2-647-4-8-16	409	209	596	14	17	356			0.0342298		0.870416			0.0669856		0.0813397
P14	Rostral	P14-19774-1-2A-S4R-MetGFP488 TdTom Foxp2-647-4-8-16	423	97	685	1	3	392			0.00236407		0.926714			0.0103093		0.0309278
P14	Rostral	P14-19026-2-1A-S1R-MetGFP488 TdTom Foxp2-647-4-8-16	485	166	821	3	5	463			0.00618557		0.954639			0.0180723		0.0301205
P14	Rostral	P14-19026-3-2C-S1R-MetGFP488 TdTom Foxp2-647-4-8-16	428	175	672	0	4	385			0		0.899533			0		0.0228571
											Ntsr1-Cre Fraction					GFP Cell Fraction
											GFP+ Ntsr1+/Ntsr1+		Foxp2+Ntsr1+/Ntsr1+			Ntsr1+GFP+/GFP+		Foxp2+GFP+/GFP+
P0	Total	P0-28919-2-MetGFP488 tdTomato Foxp2-647-20x-3-12-16	1706	1020	3999	50	186	1522			0.0293083		0.892145			0.0490196		0.182353
P0	Total	P0-28919-4-MetGFP488tdTomatoFoxp2-647-20x-4-1-16	1589	791	5059	33	177	1385			0.0207678		0.871617			0.0417193		0.223767
P0	Total	P0-28921-1-MetGFP488 tdTomato Foxp2-647-20x-4-1-16	1747	1131	3779	74	186	1620			0.0423583		0.927304			0.0654288		0.164456
P7	Total	P7-18890-2-Ntsr1-cre MetGFP488 Foxp2647-4-1-16	1775	1324	2482	75	118	1500			0.0422535		0.84507			0.0566465		0.0891239
P7	Total	P7-19648-3-2D-s3L-Foxp2647 Ntsr1tdTomato and MetGFP-9-12-16	2036	1086	2896	72	158	1794			0.0353635		0.881139			0.0662983		0.145488
P7	Total	P7-19813-6-2D-s3L-Foxp2647 Ntsr1tdTomato and MetGFP-9-21-16	1734	1245	2203	69	120	1555			0.0397924		0.89677			0.0554217		0.0963855
P14	Total	P14-19774-1-4A-S3L-MetGFP488 TdTom Foxp2-647-4-8-16	1381	301	2037	3	4	1223			0.00217234		0.88559			0.00996678		0.013289
P14	Total	P14-19026-2-MetGFP488 TdTom Foxp2-647-4-8-16	1336	538	2305	10	33	1244			0.00748503		0.931138			0.0185874		0.0613383
P14	Total	P14-19026-3-MetGFP488 TdTom Foxp2-647-4-8-16	1235	575	1890	21	41	1110			0.017004		0.898785			0.0365217		0.0713043
