# Supplementary material for: FOXP2 exhibits projection neuron class specific expression, but is not required for multiple aspects of cortical histogenesis
Source: eLife. 2019 May 17;8:e42012. doi: 10.7554/eLife.42012 (PMC6561705; doi:10.7554/eLife.42012)
Supplement: Figure 2—source data 1. [file elife-42012-fig2-data1.xlsx]

## Sheet: Sheet1
Genotype	Mouse/Slide/Section ID	Ntr1+ Cells	Ntsr1+ GFP+	Ntsr1+ CCK+		GFP%	CCK%
Ntsr1-cre; Foxp2Fx	19277-3-3B-S3R	240	7	3		0.0291667	0.0125
Ntsr1-cre; Foxp2Fx	19277-6-3D-S3R	207	4	0		0.0193237	0
Ntsr1-cre; Foxp2Fx	19506-5-3A-S3R	241	3	1		0.0124481	0.00414938
Ntsr1-cre; Foxp2Fx/+	19277-1-4A-S4R	251	7	4		0.0278884	0.0159363
Ntsr1-cre; Foxp2Fx/+	19277-2-3D-S3R	227	6	2		0.0264317	0.00881057
WT	19026-2-3B-S1R	195	5	0		0.025641	0
WT	19026-3-4A-S3L	216	4	1		0.0185185	0.00462963
WT	19974-1-4B-S1R	219	3	3		0.0136986	0.0136986
		Ntr1+ Cells	Ntsr1+Fog2			Fog2%
Ntsr1-cre; Foxp2Fx	19277-3-4E-S1R	242	233			0.96281
Ntsr1-cre; Foxp2Fx	19277-6-4D-S1L	193	183			0.948187
Ntsr1-cre; Foxp2Fx	19506-5-3B-s3L	261	254			0.97318
Ntsr1-cre; Foxp2Fx/+	19277-1-5A-S1L	186	180			0.967742
Ntsr1-cre; Foxp2Fx/+	19277-2-4D-S1R	164	161			0.981707
WT	19026-2-2D-S4L	231	225			0.974026
WT	19026-3-4C-S3L	228	221			0.969298
WT	19974-1-4C-S1L	233	226			0.969957
