# Supplementary material for: FOXP2 exhibits projection neuron class specific expression, but is not required for multiple aspects of cortical histogenesis
Source: eLife. 2019 May 17;8:e42012. doi: 10.7554/eLife.42012 (PMC6561705; doi:10.7554/eLife.42012)
Supplement: Figure 3—source data 1. [file elife-42012-fig3-data1.xlsx]

## Sheet: Sheet1
Figure 3C	P0 Fog2 Counts						Figure 3F	P14 CCK counts			Figure 3G	P14 Fog2 Counts						Figure 3I		FULL CORTEX DEPTH S1BF
Genotype	Mouse ID	Rostral	Middle	Caudal	Average		Genotype	Mouse ID	CCK+ Layer 6 Cells		Genotype	Mouse ID	Rostral	Middle	Caudal	Average		Genotype			Length	Length *Pixel size (um)
Foxp2Fx/Fx	19943-2	433	382	324	379.667		Emx-cre; Foxp2 Fx/Fx	19860-3	147		Foxp2 Fx/Fx	19758-1	273	250	229	250.667		Foxp2 Fx/Fx	1	P14-19758-1-4E-s1L-5X-11-28-17.tif:0450-0712	867.75	1153.24
Foxp2Fx/Fx	19760-6	521	459	359	446.333		Emx-cre; Foxp2 Fx/Fx	19758-2	167		Foxp2 Fx/Fx	19758-5	175	178	206	186.333			2	P14-19758-1-4E-s1L-5X-11-28-17.tif:0454-0810	875.25	1163.21
Foxp2Fx/Fx	19921-2	521	434	512	489		Emx-cre; Foxp2 Fx/Fx	19758-4	150		Foxp2 Fx/Fx	19860-3	174	142	253	189.667			3	P14-19758-1-4E-s1L-5X-11-28-17.tif:0458-0650	874	1161.55
Foxp2Fx/Fx	19943-1	429	323	443	398.333		Emx-cre; Foxp2 Fx/Fx	19758-6	125		Emx-cre; Foxp2 Fx/Fx	19758-4	224	197	235	218.667			1	P14-19758-1-4E-s2L-5X-11-28-17.tif:0475-0614	866	1150.91
Foxp2Fx/Fx	19760-5	462	528	598	529.333		Foxp2Fx/Fx	19860-4	138		Emx-cre; Foxp2 Fx/Fx	19758-6	210	158	136	168			2	P14-19758-1-4E-s2L-5X-11-28-17.tif:0468-0756	876.5	1164.87
Foxp2Fx/Fx	22214-2	345	356	345	348.667		Foxp2 Fx/Fx	19758-1	152		Emx-cre; Foxp2 Fx/Fx	19860-4	186	201	169	185.333			3	P14-19758-1-4E-s2L-5X-11-28-17.tif:0482-0696	840	1116.36
Foxp2Fx/Fx	22238-2	356	320	294	323.333		Foxp2 Fx/Fx	19758-5	127		Emx-cre; Foxp2 Fx/Fx	19758-2	222	254	196	224			1	P14-19758-1-4E-s3L-5X-11-28-17.tif:0480-0697	909	1208.06
																			2	P14-19758-1-4E-s3L-5X-11-28-17.tif:0468-0648	888.5	1180.82
Emx-cre; Foxp2Fx/+	19943-4	408	365	368	380.333							P14 Ctip2 Counts							3	P14-19758-1-4E-s3L-5X-11-28-17.tif:0470-0755	880.5	1170.18
Emx-cre; Foxp2Fx/+	19943-5	413	434	425	424						Genotype	Mouse ID	Rostral	Middle	Caudal	Average					Mean	1163.24
Emx-cre; Foxp2Fx/+	19760-7	547	416	542	501.667						Foxp2 Fx/Fx	19758-1	118	97	95	103.333
Emx-cre; Foxp2Fx/+	18760-8	384	397	437	406						Foxp2 Fx/Fx	19758-5	54	70	102	75.3333
Emx-cre; Foxp2Fx/+	19921-1	598	598	440	545.333						Foxp2 Fx/Fx	19860-3	45	45	73	54.3333
Emx-cre; Foxp2Fx/+	22089-2	319	406	430	385						Emx-cre; Foxp2 Fx/Fx	19758-4	63	102	87	84		Foxp2 Fx/Fx	1	P14-19758-5-4A-s1R-5X-11-28-17.tif:0462-0528	907.5	1206.07
											Emx-cre; Foxp2 Fx/Fx	19758-6	98	65	96	86.3333			2	P14-19758-5-4A-s1R-5X-11-28-17.tif:0476-0618	917.67	1219.58
Emx-cre; Foxp2Fx/Fx	19921-3	401	362	355	372.667						Emx-cre; Foxp2 Fx/Fx	19860-4	80	66	50	65.3333			3	P14-19758-5-4A-s1R-5X-11-28-17.tif:0464-0446	890	1182.81
Emx-cre; Foxp2Fx/Fx	19921-4	420	313	329	354						Emx-cre; Foxp2 Fx/Fx	19758-2	78	39	65	60.6667			1	P14-19758-5-4A-s3R-5X-11-28-17.tif:0455-0474	795.83	1057.66
Emx-cre; Foxp2Fx/Fx	19921-8	382	283	375	346.667														2	P14-19758-5-4A-s3R-5X-11-28-17.tif:0466-0538	824	1095.1
Emx-cre; Foxp2Fx/Fx	19943-6	406	322	317	348.333														3	P14-19758-5-4A-s3R-5X-11-28-17.tif:0460-0626	834	1108.39
Emx-cre; Foxp2Fx/Fx	22089-1	314	285	335	311.333														1	P14-19758-5-4A-s4R-5X-11-28-17.tif:0451-0495	793.83	1055
Emx-cre; Foxp2Fx/Fx	22214-3	432	417	441	430														2	P14-19758-5-4A-s4R-5X-11-28-17.tif:0453-0532	819	1088.45
Emx-cre; Foxp2Fx/Fx	22238-3	363	355	295	337.667														3	P14-19758-5-4A-s4R-5X-11-28-17.tif:0460-0599	847	1125.66
																					Mean	1126.52
Emx-cre; WT	21436-2	495	378	399	424
Emx-cre; WT	21436-3	420	382	326	376
Emx-cre; WT	21436-7	504	364	468	445.333
Emx-cre; WT	21436-8	366	340	402	369.333													Foxp2 Fx/Fx	1	P14-19860-3-5A-s1L-5X-4-15-18.tif:0507-0730	819.75	1089.45
Emx-cre; WT	22041-8	607	408	381	465.333														2	P14-19860-3-5A-s1L-5X-4-15-18.tif:0505-0622	826.5	1098.42
Emx-cre; WT	22041-6	478	594	436	502.667														3	P14-19860-3-5A-s1L-5X-4-15-18.tif:0505-0827	808	1073.83
																			1	P14-19860-3-5A-s2L-5X-4-15-18.tif:0517-0446	837	1112.37
																			2	P14-19860-3-5A-s2L-5X-4-15-18.tif:0499-0510	826	1097.75
Figure 3D	P0 Ctip2+/Fog2- Counts																		3	P14-19860-3-5A-s2L-5X-4-15-18.tif:0517-0395	841	1117.69
Genotype	Mouse ID	Rostral	Middle	Caudal	Average														1	P14-19860-3-5A-s4L-5X-4-15-18.tif:0526-0721	803	1067.19
Foxp2Fx/Fx	19943-2	157	100	105	120.667														2	P14-19860-3-5A-s4L-5X-4-15-18.tif:0528-0638	818.33	1087.56
Foxp2Fx/Fx	19760-6	148	119	107	124.667														3	P14-19860-3-5A-s4L-5X-4-15-18.tif:0512-0802	781.5	1038.61
Foxp2Fx/Fx	19921-2	176	119	157	150.667																Mean	1086.99
Foxp2Fx/Fx	19943-1	151	112	121	128
Foxp2Fx/Fx	19760-5	184	153	196	177.667
Foxp2Fx/Fx	22214-2	120	106	120	115.333
Foxp2Fx/Fx	22238-2	126	125	89	113.333													Emx-cre; Foxp2 Fx/Fx	1	P14-19758-4-4E-s1L-5X-11-28-17.tif:0472-0740	863.25	1147.26
																			2	P14-19758-4-4E-s1L-5X-11-28-17.tif:0471-0614	855	1136.3
Emx-cre; Foxp2Fx/+	19943-4	125	118	107	116.667														3	P14-19758-4-4E-s1L-5X-11-28-17.tif:0478-0494	868	1153.57
Emx-cre; Foxp2Fx/+	19943-5	137	115	122	124.667														1	P14-19758-4-4E-s3L-5X-11-28-17.tif:0488-0612	846.25	1124.67
Emx-cre; Foxp2Fx/+	19760-7	195	168	174	179														2	P14-19758-4-4E-s3L-5X-11-28-17.tif:0486-0690	848.83	1128.1
Emx-cre; Foxp2Fx/+	18760-8	127	169	152	149.333														3	P14-19758-4-4E-s3L-5X-11-28-17.tif:0485-0752	857	1138.95
Emx-cre; Foxp2Fx/+	19921-1	201	198	184	194.333														1	P14-19758-4-4E-s4L-5X-11-28-17.tif:0418-0692	771	1024.66
Emx-cre; Foxp2Fx/+	22089-2	105	117	126	116														2	P14-19758-4-4E-s4L-5X-11-28-17.tif:0418-0642	792.5	1053.23
																			3	P14-19758-4-4E-s4L-5X-11-28-17.tif:0406-0788	762.58	1013.47
Emx-cre; Foxp2Fx/Fx	19921-3	108	142	112	120.667																Mean	1102.24
Emx-cre; Foxp2Fx/Fx	19921-4	135	129	150	138
Emx-cre; Foxp2Fx/Fx	19921-8	114	105	128	115.667
Emx-cre; Foxp2Fx/Fx	19943-6	131	96	104	110.333
Emx-cre; Foxp2Fx/Fx	22089-1	122	98	94	104.667													Emx-cre; Foxp2 Fx/Fx	1	P14-19758-6-4D-s1L-5X-11-28-17.tif:0499-0768	969	1287.8
Emx-cre; Foxp2Fx/Fx	22214-3	167	139	187	164.333														2	P14-19758-6-4D-s1L-5X-11-28-17.tif:0499-0686	982	1305.08
Emx-cre; Foxp2Fx/Fx	22238-3	142	103	116	120.333														3	P14-19758-6-4D-s1L-5X-11-28-17.tif:0518-0572	994.33	1321.46
																			1	P14-19758-6-4D-s2L-5X-11-28-17.tif:0486-0746	947.67	1259.45
Emx-cre; WT	21436-2	126	110	100	112														2	P14-19758-6-4D-s2L-5X-11-28-17.tif:0489-0826	919.25	1221.68
Emx-cre; WT	21436-3	121	100	80	100.333														3	P14-19758-6-4D-s2L-5X-11-28-17.tif:0478-0704	936	1243.94
Emx-cre; WT	21436-7	149	130	108	129														1	P14-19758-6-4D-s4L-5X-11-28-17.tif:0468-0324	911	1210.72
Emx-cre; WT	21436-8	115	140	114	123														2	P14-19758-6-4D-s4L-5X-11-28-17.tif:0473-0430	905	1202.74
Emx-cre; WT	22041-8	159	122	123	134.667														3	P14-19758-6-4D-s4L-5X-11-28-17.tif:0469-0382	907.5	1206.07
Emx-cre; WT	22041-6	159	178	113	150																Mean	1251
																		Emx-cre; Foxp2 Fx/Fx	1	P14-19758-2-4C-s1L-5X-4-15-18.tif:0461-0490	866	1150.91
																			2	P14-19758-2-4C-s1L-5X-4-15-18.tif:0453-0581	859.67	1142.5
																			3	P14-19758-2-4C-s1L-5X-4-15-18.tif:0453-0664	859	1141.61
																			1	P14-19758-2-4C-s2L-5X-4-15-18.tif:0485-0734	846.5	1125
																			2	P14-19758-2-4C-s2L-5X-4-15-18.tif:0504-0609	871.83	1158.66
																			3	P14-19758-2-4C-s2L-5X-4-15-18.tif:0482-0871	825	1096.42
																			1	P14-19758-2-4C-s3L-5X-4-15-18.tif:0489-0674	875.67	1163.77
																			2	P14-19758-2-4C-s3L-5X-4-15-18.tif:0483-0748	857	1138.95
																			3	P14-19758-2-4C-s3L-5X-4-15-18.tif:0490-0596	881.5	1171.51
																					Mean	1143.26
																		Emx-cre; Foxp2 Fx/Fx	1	P14-19860-4-5A-1R-5X-4-15-18.tif:0481-0658	839	1115.03
																			2	P14-19860-4-5A-1R-5X-4-15-18.tif:0493-0808	868.33	1154.01
																			3	P14-19860-4-5A-1R-5X-4-15-18.tif:0508-0915	873	1160.22
																			1	P14-19860-4-5A-s2R-5X-4-15-18.tif:0472-0777	808	1073.83
																			2	P14-19860-4-5A-s2R-5X-4-15-18.tif:0474-0866	817	1085.79
																			3	P14-19860-4-5A-s2R-5X-4-15-18.tif:0482-0948	828.5	1101.08
																			1	P14-19860-4-5A-s3R-5X-4-15-18.tif:0494-0681	810	1076.49
																			2	P14-19860-4-5A-s3R-5X-4-15-18.tif:0510-0820	834.67	1109.28
																			3	P14-19860-4-5A-s3R-5X-4-15-18.tif:0531-0950	838.5	1114.37
																					Mean	1110.01
